# Supplementary material for: Multiple local σ-aromaticity of nonagermanide clusters
Source: Royal Society of Chemistry journal article supplement (doi:10.1039/c9sc00929a), 2019-01-01
Supplement: c9sc00929a1.pdf [file c9sc00929a1.pdf]

# Multiple Local $\sigma$ -Aromaticity of the Nonagermanide Clusters

Nikolay V. Tkachenko and Alexander I. Boldyrev\*

Department of Chemistry and Biochemistry

Utah State University

Logan, Utah 84322-0300

\**e-mail*: [a.i.boldyrev@usu.edu](mailto:a.i.boldyrev@usu.edu)

KEYWORDS: multiple  $\sigma$ -aromaticity, Zintl anions, chemical bonding, germanium, reactivity

## Supporting Information

### Contents

|                                                                |     |
|----------------------------------------------------------------|-----|
| 1. Complete chemical bonding pattern of selected species ..... | S2  |
| 2. Optimized geometries of investigated molecules.....         | S7  |
| 3. Coordinates of chosen points for NICS calculation.....      | S20 |

## 1. Complete chemical bonding pattern of selected species.

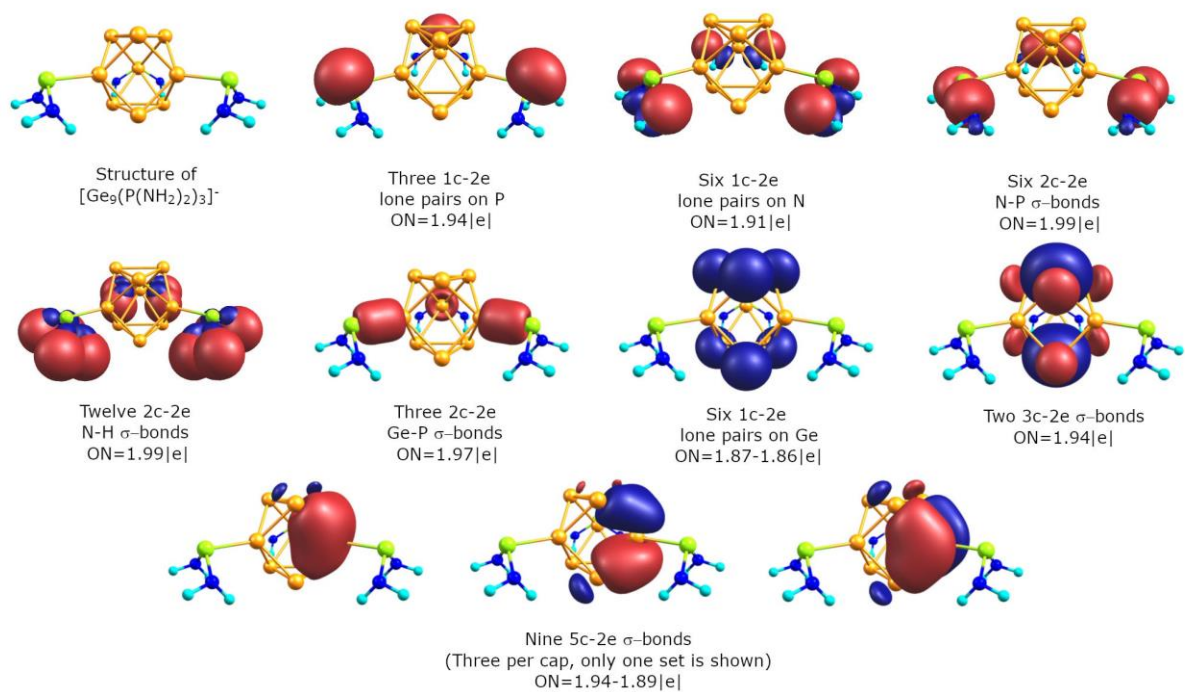

**Figure S1.** Chemical bonding picture of  $[\text{Ge}_9\{\text{P}(\text{NH}_2)_2\}_3]^-$  cluster.

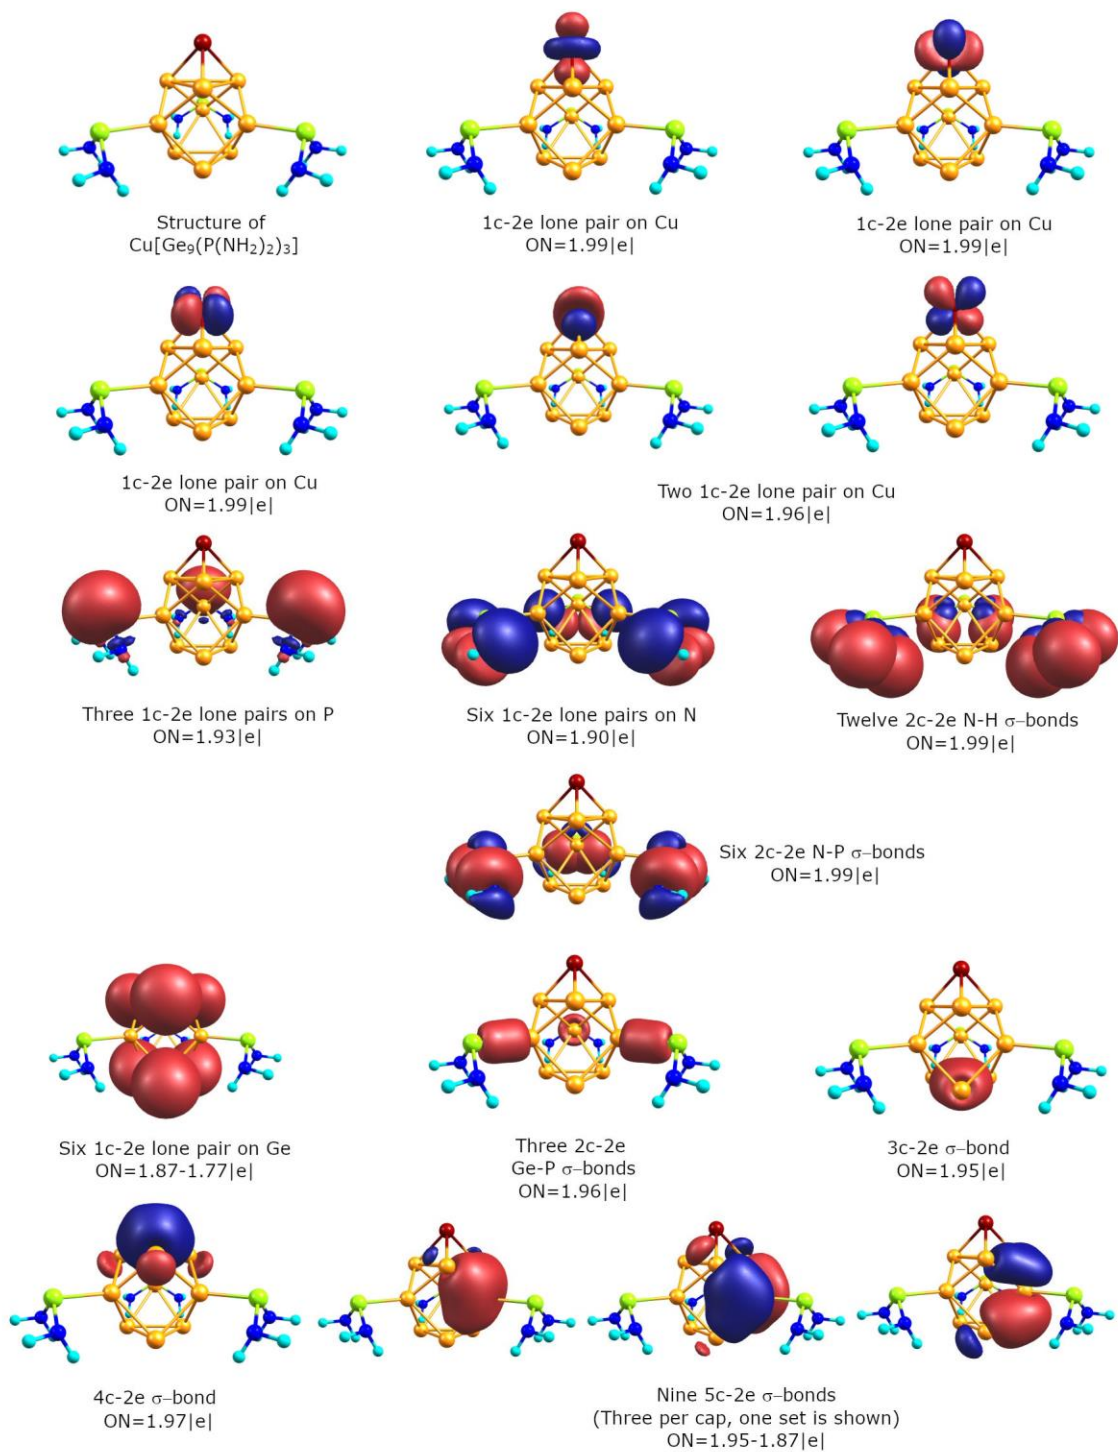

**Figure S2.** Chemical bonding picture of  $\text{Cu}[\text{Ge}_9\{\text{P}(\text{NH}_2)_2\}_3]$  cluster.

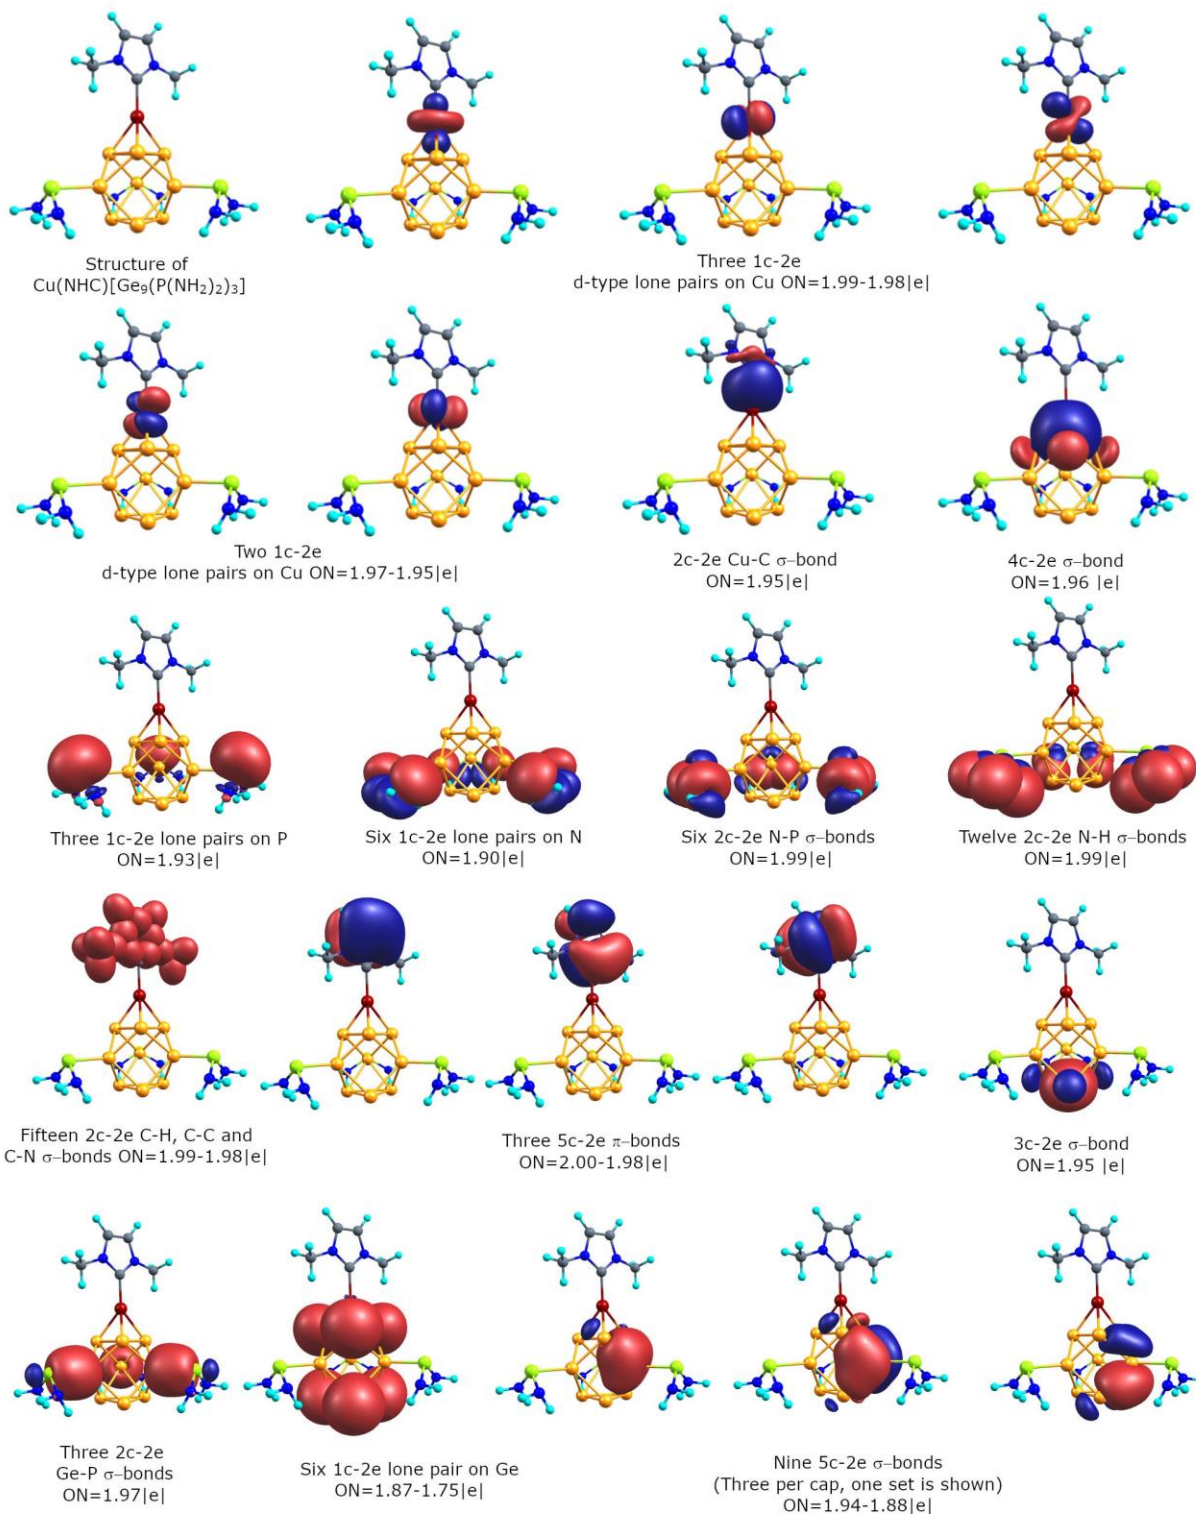

**Figure S3.** Chemical bonding picture of  $\text{Cu}(\text{NHC})[\text{Ge}_9\{\text{P}(\text{NH}_2)_2\}_3]$  cluster.

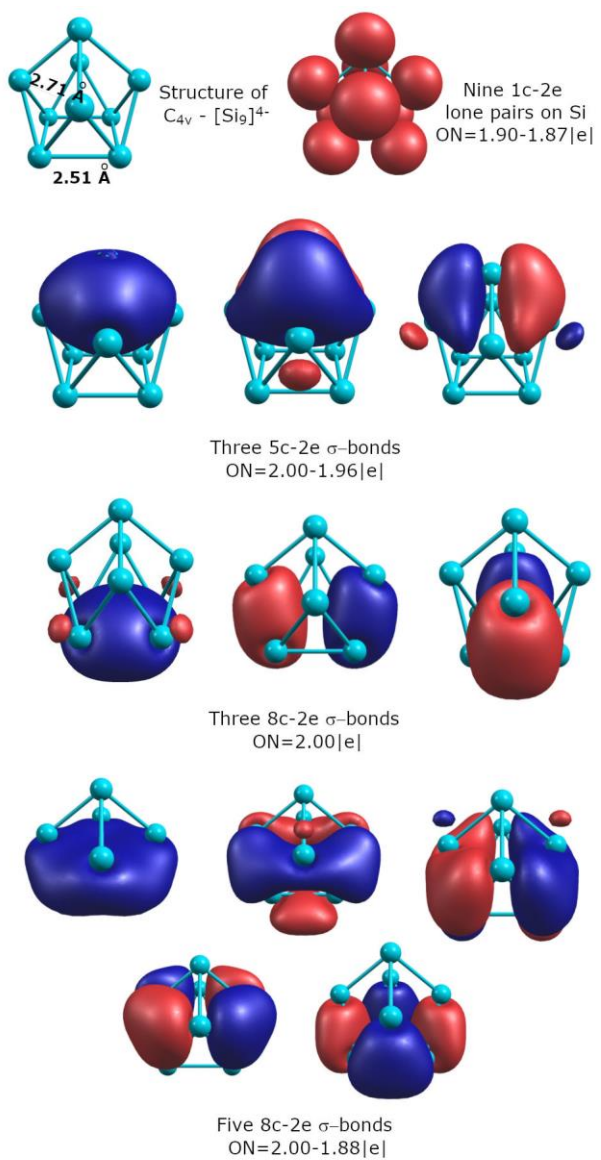

**Figure S4.** Chemical bonding picture of  $C_{4v}$   $[Si_9]^{4+}$  cluster.

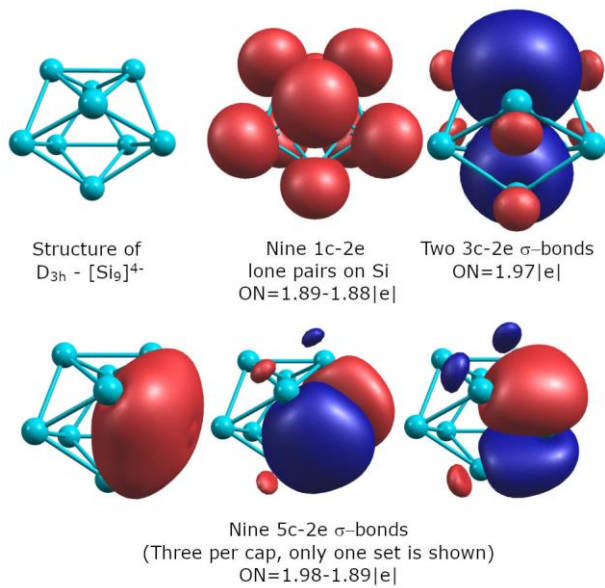

**Figure S5.** Chemical bonding picture of  $D_{3h}$   $[\text{Si}_9]^{4-}$  cluster.

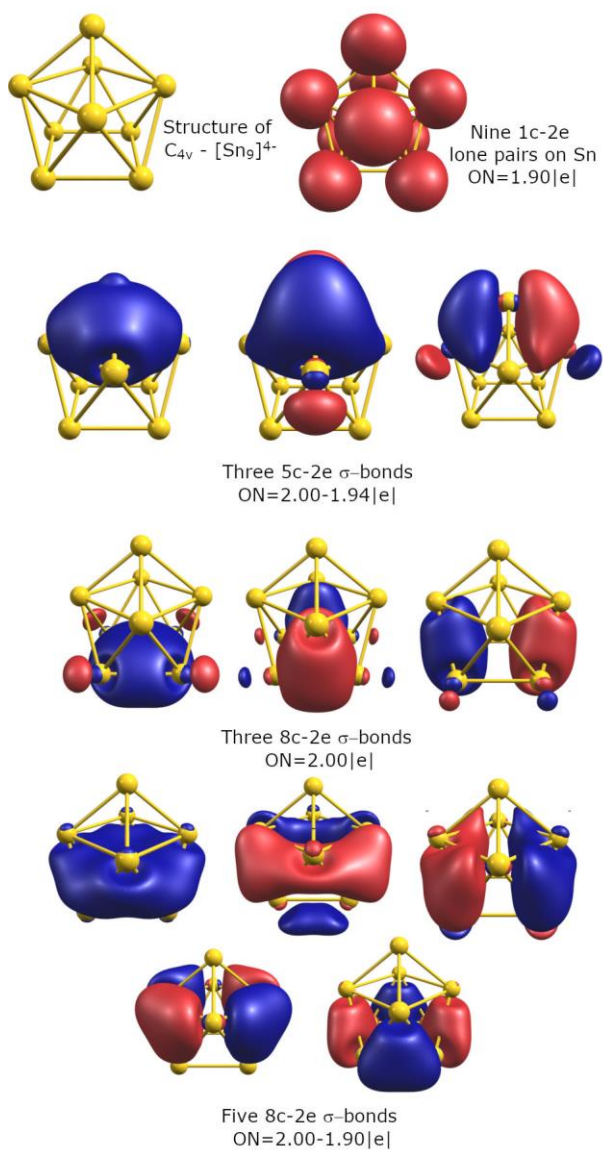

**Figure S6.** Chemical bonding picture of  $C_{4v}$   $[Sn_9]^{4-}$  cluster.

## 2. Optimized geometries of investigated molecules.

**Table S1.** Coordinates of optimized geometries, total energies and ZPE corrections of investigated molecules.

|                          |                                                                                             |             |             |             |
|--------------------------|---------------------------------------------------------------------------------------------|-------------|-------------|-------------|
| $C_{4v}$ - $[Ge_9]^{4-}$ | PBE0/LANL2DZ (0 imaginary Frequencies, $E_{elec} = -33.6748928$ , ZPE correction= 0.006780) |             |             |             |
|                          | 32                                                                                          | 0.000000000 | 2.145834000 | 0.814083000 |
|                          | 32                                                                                          | 2.145834000 | 0.000000000 | 0.814083000 |

|                                                    |                                                                                                                                     |              |              |              |
|----------------------------------------------------|-------------------------------------------------------------------------------------------------------------------------------------|--------------|--------------|--------------|
|                                                    | 32                                                                                                                                  | 1.377314000  | 1.377314000  | -1.443071000 |
|                                                    | 32                                                                                                                                  | -2.145834000 | 0.000000000  | 0.814083000  |
|                                                    | 32                                                                                                                                  | -1.377314000 | -1.377314000 | -1.443071000 |
|                                                    | 32                                                                                                                                  | 0.000000000  | -2.145834000 | 0.814083000  |
|                                                    | 32                                                                                                                                  | -1.377314000 | 1.377314000  | -1.443071000 |
|                                                    | 32                                                                                                                                  | 0.000000000  | 0.000000000  | 2.515949000  |
|                                                    | 32                                                                                                                                  | 1.377314000  | -1.377314000 | -1.443071000 |
| D <sub>3h</sub> - [Ge <sub>9</sub> ] <sup>4+</sup> | PBE0/LANL2DZ (0 imaginary Frequencies, E <sub>elec</sub> = -33.6748643, ZPE correction= 0.006748)                                   |              |              |              |
|                                                    | 32                                                                                                                                  | -0.808114000 | 1.399561000  | 1.671373000  |
|                                                    | 32                                                                                                                                  | -0.808114000 | -1.399716000 | 1.671129000  |
|                                                    | 32                                                                                                                                  | 1.616349000  | 0.000069000  | 1.671003000  |
|                                                    | 32                                                                                                                                  | -0.808114000 | 1.399561000  | -1.671373000 |
|                                                    | 32                                                                                                                                  | 1.616349000  | 0.000069000  | -1.671003000 |
|                                                    | 32                                                                                                                                  | -0.808114000 | -1.399716000 | -1.671129000 |
|                                                    | 32                                                                                                                                  | 1.239488000  | 2.147435000  | 0.000000000  |
|                                                    | 32                                                                                                                                  | -2.479494000 | 0.000067000  | 0.000000000  |
|                                                    | 32                                                                                                                                  | 1.239764000  | -2.147329000 | 0.000000000  |
| C <sub>4v</sub> - [Ge <sub>9</sub> ] <sup>4+</sup> | PBE0/aug-cc-pvdz (1 imaginary Frequency (-42.3924 cm <sup>-1</sup> ), E <sub>elec</sub> = -18690.3069900, ZPE correction= 0.007066) |              |              |              |
|                                                    | 32                                                                                                                                  | 2.031521000  | 0.000000000  | 0.789827000  |
|                                                    | 32                                                                                                                                  | 0.000000000  | -2.031521000 | 0.789827000  |
|                                                    | 32                                                                                                                                  | 1.322067000  | -1.322517000 | -1.404647000 |
|                                                    | 32                                                                                                                                  | 0.000000000  | 2.031521000  | 0.789827000  |
|                                                    | 32                                                                                                                                  | -1.322067000 | 1.322517000  | -1.404647000 |
|                                                    | 32                                                                                                                                  | -2.031521000 | 0.000000000  | 0.789827000  |
|                                                    | 32                                                                                                                                  | 1.322517000  | 1.322067000  | -1.404647000 |



|                        |                                                                                                                         |              |              |              |
|------------------------|-------------------------------------------------------------------------------------------------------------------------|--------------|--------------|--------------|
|                        | 32                                                                                                                      | 0.000000000  | 0.000000000  | 2.459284000  |
|                        | 32                                                                                                                      | -1.322517000 | -1.322067000 | -1.404647000 |
| $D_{3h} - [Ge_9]^{4-}$ | PBE0/ aug-cc-pvdz (0 imaginary Frequencies, $E_{elec} = -18690.3096466$ , ZPE correction= 0.007200)                     |              |              |              |
|                        | 32                                                                                                                      | 0.791113000  | 1.370249000  | 1.502480000  |
|                        | 32                                                                                                                      | -1.582227000 | 0.000000000  | 1.502480000  |
|                        | 32                                                                                                                      | 0.791113000  | -1.370249000 | 1.502480000  |
|                        | 32                                                                                                                      | 0.791113000  | 1.370249000  | -1.502480000 |
|                        | 32                                                                                                                      | 0.791113000  | -1.370249000 | -1.502480000 |
|                        | 32                                                                                                                      | -1.582227000 | 0.000000000  | -1.502480000 |
|                        | 32                                                                                                                      | 2.456815000  | 0.000124000  | 0.000000000  |
|                        | 32                                                                                                                      | -1.228515000 | 2.127602000  | 0.000000000  |
|                        | 32                                                                                                                      | -1.228300000 | -2.127726000 | 0.000000000  |
| $C_{4v} - [Ge_9]^{4-}$ | PBE0/aug-cc-pvtz (1 imaginary Frequency (-123.5556 $cm^{-1}$ ), $E_{elec} = -18690.9296291$ , ZPE correction= 0.006898) |              |              |              |
|                        | 32                                                                                                                      | 1.419027000  | 1.419014000  | 0.793758000  |
|                        | 32                                                                                                                      | 1.419014000  | -1.419027000 | 0.793758000  |
|                        | 32                                                                                                                      | 1.857957000  | 0.000000000  | -1.413427000 |
|                        | 32                                                                                                                      | -1.419014000 | 1.419027000  | 0.793758000  |
|                        | 32                                                                                                                      | -1.857957000 | 0.000000000  | -1.413427000 |
|                        | 32                                                                                                                      | -1.419027000 | -1.419014000 | 0.793758000  |
|                        | 32                                                                                                                      | 0.000000000  | 1.857957000  | -1.413427000 |
|                        | 32                                                                                                                      | 0.000000000  | 0.000000000  | 2.478676000  |
|                        | 32                                                                                                                      | 0.000000000  | -1.857957000 | -1.413427000 |
| $D_{3h} - [Ge_9]^{4-}$ | PBE0/ aug-cc-pvtz (0 imaginary Frequencies, $E_{elec} = -18690.9465320$ , ZPE correction= 0.007440)                     |              |              |              |
|                        | 32                                                                                                                      | -1.608451000 | 0.000005000  | 1.410505000  |

|                        |                                                                                                 |              |              |              |
|------------------------|-------------------------------------------------------------------------------------------------|--------------|--------------|--------------|
|                        | 32                                                                                              | 0.804247000  | -1.393009000 | 1.410273000  |
|                        | 32                                                                                              | 0.804247000  | 1.392987000  | 1.410320000  |
|                        | 32                                                                                              | -1.608451000 | 0.000005000  | -1.410505000 |
|                        | 32                                                                                              | 0.804247000  | 1.392987000  | -1.410320000 |
|                        | 32                                                                                              | 0.804247000  | -1.393009000 | -1.410273000 |
|                        | 32                                                                                              | -1.250522000 | 2.165909000  | 0.000000000  |
|                        | 32                                                                                              | -1.250512000 | -2.165864000 | 0.000000000  |
|                        | 32                                                                                              | 2.500947000  | -0.000012000 | 0.000000000  |
| $C_{4v} - [Ge_9]^{4-}$ | B3LYP/LANL2DZ (0 imaginary Frequencies, $E_{elec} = -33.5632179412$ , ZPE correction= 0.006303) |              |              |              |
|                        | 32                                                                                              | 1.536155000  | 1.536160000  | 0.820880000  |
|                        | 32                                                                                              | 1.536160000  | -1.536155000 | 0.820880000  |
|                        | 32                                                                                              | 1.970253000  | 0.000000000  | -1.454127000 |
|                        | 32                                                                                              | -1.536160000 | 1.536155000  | 0.820880000  |
|                        | 32                                                                                              | -1.970253000 | 0.000000000  | -1.454127000 |
|                        | 32                                                                                              | -1.536155000 | -1.536160000 | 0.820880000  |
|                        | 32                                                                                              | 0.000000000  | 1.970253000  | -1.454127000 |
|                        | 32                                                                                              | 0.000000000  | 0.000000000  | 2.532987000  |
|                        | 32                                                                                              | 0.000000000  | -1.970253000 | -1.454127000 |
| $D_{3h} - [Ge_9]^{4-}$ | B3LYP/LANL2DZ (0 imaginary Frequencies, $E_{elec} = -33.5631968217$ , ZPE correction= 0.006273) |              |              |              |
|                        | 32                                                                                              | -0.815929000 | 1.413230000  | 1.693468000  |
|                        | 32                                                                                              | -0.815929000 | -1.413230000 | 1.693468000  |
|                        | 32                                                                                              | 1.631858000  | 0.000000000  | 1.693468000  |
|                        | 32                                                                                              | -0.815929000 | 1.413230000  | -1.693468000 |
|                        | 32                                                                                              | 1.631858000  | 0.000000000  | -1.693468000 |
|                        | 32                                                                                              | -0.815929000 | -1.413230000 | -1.693468000 |

|                        |                                                                                                                          |              |              |              |
|------------------------|--------------------------------------------------------------------------------------------------------------------------|--------------|--------------|--------------|
|                        | 32                                                                                                                       | 1.251034000  | 2.166937000  | 0.000000000  |
|                        | 32                                                                                                                       | -2.502139000 | -0.000041000 | 0.000000000  |
|                        | 32                                                                                                                       | 1.251105000  | -2.166895000 | 0.000000000  |
| $C_{4v} - [Ge_9]^{4-}$ | B3LYP/aug-cc-pvdz (1 imaginary Frequency (-18.8437 $cm^{-1}$ ), $E_{elec} = -18693.0103353$ , ZPE correction= 0.006405)  |              |              |              |
|                        | 32                                                                                                                       | 1.472724000  | 1.472709000  | 0.801639000  |
|                        | 32                                                                                                                       | 1.472709000  | -1.472724000 | 0.801639000  |
|                        | 32                                                                                                                       | 1.909141000  | 0.000000000  | -1.422199000 |
|                        | 32                                                                                                                       | -1.472709000 | 1.472724000  | 0.801639000  |
|                        | 32                                                                                                                       | -1.909141000 | 0.000000000  | -1.422199000 |
|                        | 32                                                                                                                       | -1.472724000 | -1.472709000 | 0.801639000  |
|                        | 32                                                                                                                       | 0.000000000  | 1.909141000  | -1.422199000 |
|                        | 32                                                                                                                       | 0.000000000  | 0.000000000  | 2.482237000  |
|                        | 32                                                                                                                       | 0.000000000  | -1.909141000 | -1.422199000 |
| $D_{3h} - [Ge_9]^{4-}$ | B3LYP/aug-cc-pvdz (0 imaginary Frequencies, $E_{elec} = -18693.0109539$ , ZPE correction= 0.006433)                      |              |              |              |
|                        | 32                                                                                                                       | 1.601809000  | -0.000051000 | 1.576911000  |
|                        | 32                                                                                                                       | -0.800922000 | 1.387309000  | 1.576725000  |
|                        | 32                                                                                                                       | -0.800922000 | -1.387194000 | 1.576915000  |
|                        | 32                                                                                                                       | 1.601809000  | -0.000051000 | -1.576911000 |
|                        | 32                                                                                                                       | -0.800922000 | -1.387194000 | -1.576915000 |
|                        | 32                                                                                                                       | -0.800922000 | 1.387309000  | -1.576725000 |
|                        | 32                                                                                                                       | 1.233353000  | -2.136376000 | 0.000000000  |
|                        | 32                                                                                                                       | 1.233544000  | 2.136261000  | 0.000000000  |
|                        | 32                                                                                                                       | -2.466828000 | -0.000013000 | 0.000000000  |
| $C_{4v} - [Ge_9]^{4-}$ | B3LYP/aug-cc-pvtz (1 imaginary Frequency (-129.9552 $cm^{-1}$ ), $E_{elec} = -18693.6362612$ , ZPE correction= 0.006211) |              |              |              |

|                         |                                                                                                                                                                               |              |              |              |
|-------------------------|-------------------------------------------------------------------------------------------------------------------------------------------------------------------------------|--------------|--------------|--------------|
|                         | 32                                                                                                                                                                            | 0.000000000  | 2.051750000  | 0.805061000  |
|                         | 32                                                                                                                                                                            | 2.051750000  | 0.000000000  | 0.805061000  |
|                         | 32                                                                                                                                                                            | 1.337526000  | 1.337526000  | -1.430326000 |
|                         | 32                                                                                                                                                                            | -2.051750000 | 0.000000000  | 0.805061000  |
|                         | 32                                                                                                                                                                            | -1.337526000 | -1.337526000 | -1.430326000 |
|                         | 32                                                                                                                                                                            | 0.000000000  | -2.051750000 | 0.805061000  |
|                         | 32                                                                                                                                                                            | -1.337526000 | 1.337526000  | -1.430326000 |
|                         | 32                                                                                                                                                                            | 0.000000000  | 0.000000000  | 2.501061000  |
|                         | 32                                                                                                                                                                            | 1.337526000  | -1.337526000 | -1.430326000 |
| $D_{3h} - [Ge_9]^{4-}$  | B3LYP/aug-cc-pvtz (0 imaginary Frequencies, $E_{elec} = -18693.6512336$ , ZPE correction= 0.006719)                                                                           |              |              |              |
|                         | 32                                                                                                                                                                            | -0.822647000 | 1.424872000  | 1.434270000  |
|                         | 32                                                                                                                                                                            | -0.822647000 | 1.424872000  | -1.434270000 |
|                         | 32                                                                                                                                                                            | -2.525391000 | 0.000000000  | 0.000000000  |
|                         | 32                                                                                                                                                                            | 1.645296000  | 0.000000000  | 1.434394000  |
|                         | 32                                                                                                                                                                            | 1.262693000  | -2.186984000 | 0.000000000  |
|                         | 32                                                                                                                                                                            | 1.645296000  | 0.000000000  | -1.434394000 |
|                         | 32                                                                                                                                                                            | -0.822647000 | -1.424872000 | 1.434271000  |
|                         | 32                                                                                                                                                                            | 1.262693000  | 2.186984000  | 0.000000000  |
|                         | 32                                                                                                                                                                            | -0.822647000 | -1.424872000 | -1.434271000 |
| $[Ge_9(P(NH_2)_2)_3]^-$ | PBE0/ aug-cc-pvdz (2 degenerate imaginary Frequencies (rotation of $-P(NH_2)_2$ groups, $-11.8015 \text{ cm}^{-1}$ ), $E_{elec} = -20049.9555733$ , ZPE correction= 0.169815) |              |              |              |
|                         | 32                                                                                                                                                                            | 1.359718000  | 0.785033000  | 1.924924000  |
|                         | 32                                                                                                                                                                            | -1.359718000 | 0.785033000  | 1.924924000  |
|                         | 32                                                                                                                                                                            | 0.000000000  | -1.570067000 | 1.924924000  |
|                         | 32                                                                                                                                                                            | 1.342156000  | 0.774894000  | -1.584128000 |

|  |    |              |              |              |
|--|----|--------------|--------------|--------------|
|  | 32 | 0.000000000  | -1.549788000 | -1.584128000 |
|  | 32 | -1.342156000 | 0.774894000  | -1.584128000 |
|  | 32 | 1.779103000  | -1.027166000 | 0.187338000  |
|  | 32 | 0.000000000  | 2.054332000  | 0.187338000  |
|  | 32 | -1.779103000 | -1.027166000 | 0.187338000  |
|  | 15 | 0.000000000  | 4.396758000  | 0.087242000  |
|  | 7  | 1.437965000  | 4.563066000  | -0.895191000 |
|  | 1  | 1.543398000  | 3.946082000  | -1.696258000 |
|  | 1  | 1.656366000  | 5.522403000  | -1.141854000 |
|  | 7  | -1.437965000 | 4.563066000  | -0.895191000 |
|  | 1  | -1.656366000 | 5.522403000  | -1.141854000 |
|  | 1  | -1.543398000 | 3.946082000  | -1.696258000 |
|  | 15 | 3.807705000  | -2.198379000 | 0.087242000  |
|  | 7  | 3.232748000  | -3.526847000 | -0.895191000 |
|  | 1  | 2.645708000  | -3.309663000 | -1.696258000 |
|  | 1  | 3.954358000  | -4.195656000 | -1.141854000 |
|  | 7  | 4.670713000  | -1.036219000 | -0.895191000 |
|  | 1  | 5.610724000  | -1.326747000 | -1.141854000 |
|  | 1  | 4.189106000  | -0.636419000 | -1.696258000 |
|  | 15 | -3.807705000 | -2.198379000 | 0.087242000  |
|  | 7  | -3.232748000 | -3.526847000 | -0.895191000 |
|  | 1  | -3.954358000 | -4.195656000 | -1.141854000 |
|  | 1  | -2.645708000 | -3.309663000 | -1.696258000 |
|  | 7  | -4.670713000 | -1.036219000 | -0.895191000 |
|  | 1  | -4.189106000 | -0.636419000 | -1.696258000 |
|  | 1  | -5.610724000 | -1.326747000 | -1.141854000 |

| [Ge <sub>9</sub> (P(NH <sub>2</sub> ) <sub>2</sub> ) <sub>3</sub> ] <sup>-</sup> | PBE0/LANL2DZ (0 imaginary Frequencies, E <sub>elec</sub> = -389.038813956, ZPE correction= 0.171352) |              |              |              |
|----------------------------------------------------------------------------------|------------------------------------------------------------------------------------------------------|--------------|--------------|--------------|
|                                                                                  | 32                                                                                                   | 1.437706000  | 0.830060000  | 1.968781000  |
|                                                                                  | 32                                                                                                   | -1.437706000 | 0.830060000  | 1.968781000  |
|                                                                                  | 32                                                                                                   | 0.000000000  | -1.660119000 | 1.968781000  |
|                                                                                  | 32                                                                                                   | 1.417056000  | 0.818138000  | -1.637792000 |
|                                                                                  | 32                                                                                                   | 0.000000000  | -1.636275000 | -1.637792000 |
|                                                                                  | 32                                                                                                   | -1.417056000 | 0.818138000  | -1.637792000 |
|                                                                                  | 32                                                                                                   | 1.830812000  | -1.057020000 | 0.179480000  |
|                                                                                  | 32                                                                                                   | 0.000000000  | 2.114040000  | 0.179480000  |
|                                                                                  | 32                                                                                                   | -1.830812000 | -1.057020000 | 0.179480000  |
|                                                                                  | 15                                                                                                   | 0.000000000  | 4.525417000  | 0.102796000  |
|                                                                                  | 7                                                                                                    | 1.417310000  | 4.738741000  | -0.927912000 |
|                                                                                  | 1                                                                                                    | 1.718004000  | 4.068239000  | -1.623332000 |
|                                                                                  | 1                                                                                                    | 1.987586000  | 5.564738000  | -0.819768000 |
|                                                                                  | 7                                                                                                    | -1.417310000 | 4.738741000  | -0.927912000 |
|                                                                                  | 1                                                                                                    | -1.987586000 | 5.564738000  | -0.819768000 |
|                                                                                  | 1                                                                                                    | -1.718004000 | 4.068239000  | -1.623332000 |
|                                                                                  | 15                                                                                                   | 3.919126000  | -2.262708000 | 0.102796000  |
|                                                                                  | 7                                                                                                    | 3.395215000  | -3.596797000 | -0.927912000 |
|                                                                                  | 1                                                                                                    | 2.664196000  | -3.521955000 | -1.623332000 |
|                                                                                  | 1                                                                                                    | 3.825411000  | -4.503669000 | -0.819768000 |
|                                                                                  | 7                                                                                                    | 4.812525000  | -1.141944000 | -0.927912000 |
|                                                                                  | 1                                                                                                    | 5.812998000  | -1.061069000 | -0.819768000 |
|                                                                                  | 1                                                                                                    | 4.382201000  | -0.546284000 | -1.623332000 |
|                                                                                  | 15                                                                                                   | -3.919126000 | -2.262708000 | 0.102796000  |

|                                                                       |                                                                                                          |              |              |              |
|-----------------------------------------------------------------------|----------------------------------------------------------------------------------------------------------|--------------|--------------|--------------|
|                                                                       | 7                                                                                                        | -3.395215000 | -3.596797000 | -0.927912000 |
|                                                                       | 1                                                                                                        | -3.825411000 | -4.503669000 | -0.819768000 |
|                                                                       | 1                                                                                                        | -2.664196000 | -3.521955000 | -1.623332000 |
|                                                                       | 7                                                                                                        | -4.812525000 | -1.141944000 | -0.927912000 |
|                                                                       | 1                                                                                                        | -4.382201000 | -0.546284000 | -1.623332000 |
|                                                                       | 1                                                                                                        | -5.812998000 | -1.061069000 | -0.819768000 |
| Cu[Ge <sub>9</sub> (P(NH <sub>2</sub> ) <sub>2</sub> ) <sub>3</sub> ] | PBE0/aug-cc-pvdz (0 imaginary Frequencies, E <sub>elec</sub> = -21690.2344825, ZPE correction= 0.171381) |              |              |              |
|                                                                       | 32                                                                                                       | -1.832411000 | -1.524237000 | 0.000000000  |
|                                                                       | 32                                                                                                       | 0.915843000  | -1.525714000 | -1.586340000 |
|                                                                       | 32                                                                                                       | 0.915843000  | -1.525714000 | 1.586340000  |
|                                                                       | 32                                                                                                       | -1.525858000 | 1.819144000  | 0.000000000  |
|                                                                       | 32                                                                                                       | 0.762526000  | 1.820033000  | 1.320857000  |
|                                                                       | 32                                                                                                       | 0.762526000  | 1.820033000  | -1.320857000 |
|                                                                       | 32                                                                                                       | -1.047006000 | 0.002151000  | 1.814481000  |
|                                                                       | 32                                                                                                       | -1.047006000 | 0.002151000  | -1.814481000 |
|                                                                       | 32                                                                                                       | 2.094135000  | 0.001998000  | 0.000000000  |
|                                                                       | 15                                                                                                       | -2.217161000 | 0.053768000  | -3.841491000 |
|                                                                       | 7                                                                                                        | -3.550553000 | 1.018891000  | -3.287048000 |
|                                                                       | 1                                                                                                        | -3.368867000 | 1.909562000  | -2.835208000 |
|                                                                       | 1                                                                                                        | -4.308501000 | 1.097390000  | -3.955883000 |
|                                                                       | 7                                                                                                        | -1.066319000 | 1.012624000  | -4.720766000 |
|                                                                       | 1                                                                                                        | -1.266239000 | 1.089902000  | -5.711760000 |
|                                                                       | 1                                                                                                        | -0.762763000 | 1.903025000  | -4.339280000 |
|                                                                       | 15                                                                                                       | -2.217161000 | 0.053768000  | 3.841491000  |
|                                                                       | 7                                                                                                        | -1.066319000 | 1.012624000  | 4.720766000  |

|                                                                            |                                                                                                          |              |              |              |
|----------------------------------------------------------------------------|----------------------------------------------------------------------------------------------------------|--------------|--------------|--------------|
|                                                                            | 1                                                                                                        | -0.762763000 | 1.903025000  | 4.339280000  |
|                                                                            | 1                                                                                                        | -1.266239000 | 1.089902000  | 5.711760000  |
|                                                                            | 7                                                                                                        | -3.550553000 | 1.018891000  | 3.287048000  |
|                                                                            | 1                                                                                                        | -4.308501000 | 1.097390000  | 3.955883000  |
|                                                                            | 1                                                                                                        | -3.368867000 | 1.909562000  | 2.835208000  |
|                                                                            | 15                                                                                                       | 4.434631000  | 0.053933000  | 0.000000000  |
|                                                                            | 7                                                                                                        | 4.620662000  | 1.015870000  | 1.434219000  |
|                                                                            | 1                                                                                                        | 5.578837000  | 1.094309000  | 1.756300000  |
|                                                                            | 1                                                                                                        | 4.137761000  | 1.905953000  | 1.505161000  |
|                                                                            | 7                                                                                                        | 4.620662000  | 1.015870000  | -1.434219000 |
|                                                                            | 1                                                                                                        | 4.137761000  | 1.905953000  | -1.505161000 |
|                                                                            | 1                                                                                                        | 5.578837000  | 1.094309000  | -1.756300000 |
|                                                                            | 29                                                                                                       | -0.001142000 | -3.157266000 | 0.000000000  |
| Cu(NHC)[Ge <sub>9</sub> (P(NH <sub>2</sub> ) <sub>2</sub> ) <sub>3</sub> ] | PBE0/aug-cc-pvdz (0 imaginary Frequencies, E <sub>elec</sub> = -21994.7799089, ZPE correction= 0.300350) |              |              |              |
|                                                                            | 32                                                                                                       | 0.857327000  | 0.820130000  | -1.477631000 |
|                                                                            | 32                                                                                                       | 0.856931000  | 0.864125000  | 1.450580000  |
|                                                                            | 32                                                                                                       | 0.822825000  | -1.694321000 | 0.023991000  |
|                                                                            | 32                                                                                                       | -2.566494000 | 0.761778000  | -1.338993000 |
|                                                                            | 32                                                                                                       | -2.565595000 | -1.517848000 | 0.023398000  |
|                                                                            | 32                                                                                                       | -2.563176000 | 0.801571000  | 1.317863000  |
|                                                                            | 32                                                                                                       | -0.772535000 | -1.052814000 | -1.793477000 |
|                                                                            | 32                                                                                                       | -0.755714000 | 2.078736000  | -0.032481000 |
|                                                                            | 32                                                                                                       | -0.770432000 | -1.000388000 | 1.823657000  |
|                                                                            | 15                                                                                                       | -0.745359000 | 4.417255000  | -0.064860000 |
|                                                                            | 7                                                                                                        | -1.704877000 | 4.613442000  | -1.503010000 |



|  |    |              |              |              |
|--|----|--------------|--------------|--------------|
|  | 1  | -2.587304000 | 4.116812000  | -1.579312000 |
|  | 1  | -1.802711000 | 5.576594000  | -1.804579000 |
|  | 7  | -1.701575000 | 4.653473000  | 1.369472000  |
|  | 1  | -1.799227000 | 5.624731000  | 1.643900000  |
|  | 1  | -2.583623000 | 4.158850000  | 1.461638000  |
|  | 15 | -0.796980000 | -2.275113000 | -3.787313000 |
|  | 7  | -1.742966000 | -3.613260000 | -3.202164000 |
|  | 1  | -2.617730000 | -3.426687000 | -2.721335000 |
|  | 1  | -1.850945000 | -4.364848000 | -3.874264000 |
|  | 7  | -1.775481000 | -1.163465000 | -4.700374000 |
|  | 1  | -1.885852000 | -1.417750000 | -5.675700000 |
|  | 1  | -2.653569000 | -0.839069000 | -4.306979000 |
|  | 15 | -0.793480000 | -2.160187000 | 3.854532000  |
|  | 7  | -1.744081000 | -3.513210000 | 3.312706000  |
|  | 1  | -1.852545000 | -4.243480000 | 4.007836000  |
|  | 1  | -2.619462000 | -3.339072000 | 2.828349000  |
|  | 7  | -1.767362000 | -1.018473000 | 4.734813000  |
|  | 1  | -2.645620000 | -0.704388000 | 4.333505000  |
|  | 1  | -1.876025000 | -1.242124000 | 5.717807000  |
|  | 29 | 2.733465000  | -0.025586000 | -0.000610000 |
|  | 6  | 4.700274000  | -0.023220000 | -0.000173000 |
|  | 7  | 5.549359000  | -1.081642000 | 0.000878000  |
|  | 6  | 6.865137000  | -0.673636000 | 0.000318000  |
|  | 6  | 6.847118000  | 0.685325000  | -0.001361000 |
|  | 7  | 5.520983000  | 1.057507000  | -0.001290000 |
|  | 1  | 7.695455000  | -1.369301000 | 0.001306000  |

|                                                                                                    |                                                                                                          |              |              |              |
|----------------------------------------------------------------------------------------------------|----------------------------------------------------------------------------------------------------------|--------------|--------------|--------------|
|                                                                                                    | 1                                                                                                        | 7.658702000  | 1.402737000  | -0.002295000 |
|                                                                                                    | 6                                                                                                        | 5.123837000  | -2.467599000 | 0.001885000  |
|                                                                                                    | 1                                                                                                        | 5.504613000  | -2.979523000 | 0.893895000  |
|                                                                                                    | 1                                                                                                        | 4.029489000  | -2.491057000 | 0.010527000  |
|                                                                                                    | 1                                                                                                        | 5.490371000  | -2.976943000 | -0.897583000 |
|                                                                                                    | 6                                                                                                        | 5.056142000  | 2.430674000  | -0.003893000 |
|                                                                                                    | 1                                                                                                        | 5.408830000  | 2.948986000  | -0.903648000 |
|                                                                                                    | 1                                                                                                        | 3.961980000  | 2.422019000  | 0.002106000  |
|                                                                                                    | 1                                                                                                        | 5.418513000  | 2.955310000  | 0.888268000  |
| {Cu[Ge <sub>9</sub> {P(NH <sub>2</sub> ) <sub>2</sub> ] <sub>3</sub> ] <sub>2</sub> } <sup>-</sup> | PBE0/aug-cc-pvdz (0 imaginary Frequencies, E <sub>elec</sub> = -41740.2521030, ZPE correction= 0.341278) |              |              |              |
|                                                                                                    | 32                                                                                                       | -1.971214000 | -1.152141000 | -1.224550000 |
|                                                                                                    | 32                                                                                                       | -1.969346000 | 1.630427000  | -0.392466000 |
|                                                                                                    | 32                                                                                                       | -1.967227000 | -0.482928000 | 1.602278000  |
|                                                                                                    | 32                                                                                                       | -5.418742000 | -1.053371000 | -1.113708000 |
|                                                                                                    | 32                                                                                                       | -5.408335000 | -0.439755000 | 1.476214000  |
|                                                                                                    | 32                                                                                                       | -5.412880000 | 1.496423000  | -0.350742000 |
|                                                                                                    | 32                                                                                                       | -3.614915000 | -2.009963000 | 0.472926000  |
|                                                                                                    | 32                                                                                                       | -3.619490000 | 0.590070000  | -1.978850000 |
|                                                                                                    | 32                                                                                                       | -3.609580000 | 1.417595000  | 1.500758000  |
|                                                                                                    | 15                                                                                                       | -3.719878000 | 1.264191000  | -4.218769000 |
|                                                                                                    | 7                                                                                                        | -4.702972000 | -0.061273000 | -4.784673000 |
|                                                                                                    | 1                                                                                                        | -5.535730000 | -0.311560000 | -4.259463000 |
|                                                                                                    | 1                                                                                                        | -4.891173000 | -0.037709000 | -5.780679000 |
|                                                                                                    | 7                                                                                                        | -4.692634000 | 2.688657000  | -3.958213000 |
|                                                                                                    | 1                                                                                                        | -4.878365000 | 3.219906000  | -4.801575000 |

|  |    |              |              |              |
|--|----|--------------|--------------|--------------|
|  | 1  | -5.524698000 | 2.613900000  | -3.380127000 |
|  | 15 | -3.711111000 | -4.284855000 | 1.018202000  |
|  | 7  | -4.676581000 | -4.107123000 | 2.460185000  |
|  | 1  | -5.508994000 | -3.525959000 | 2.423315000  |
|  | 1  | -4.859349000 | -4.979635000 | 2.943176000  |
|  | 7  | -4.700665000 | -4.774197000 | -0.332697000 |
|  | 1  | -4.888390000 | -5.770040000 | -0.365492000 |
|  | 1  | -5.534778000 | -4.235883000 | -0.548350000 |
|  | 15 | -3.700004000 | 3.022004000  | 3.203426000  |
|  | 7  | -4.673196000 | 2.088038000  | 4.309726000  |
|  | 1  | -4.855171000 | 2.553989000  | 5.191642000  |
|  | 1  | -5.507807000 | 1.627635000  | 3.958268000  |
|  | 7  | -4.681092000 | 4.177648000  | 2.340242000  |
|  | 1  | -5.516077000 | 3.851154000  | 1.862536000  |
|  | 1  | -4.864231000 | 5.030006000  | 2.857768000  |
|  | 29 | 0.000031000  | -0.002229000 | -0.007930000 |
|  | 32 | 1.969367000  | -1.633628000 | 0.380613000  |
|  | 32 | 1.967452000  | 1.149452000  | 1.215651000  |
|  | 32 | 1.971364000  | 0.479684000  | -1.611072000 |
|  | 32 | 5.413882000  | -1.494335000 | 0.357465000  |
|  | 32 | 5.418376000  | 0.442300000  | -1.468105000 |
|  | 32 | 5.408008000  | 1.055446000  | 1.122155000  |
|  | 32 | 3.619878000  | -1.415739000 | -1.503481000 |
|  | 32 | 3.610096000  | -0.594802000 | 1.976939000  |
|  | 32 | 3.614528000  | 2.008449000  | -0.478929000 |
|  | 15 | 3.700787000  | -1.262764000 | 4.219091000  |

|  |    |             |              |              |
|--|----|-------------|--------------|--------------|
|  | 7  | 4.684947000 | -2.680932000 | 3.967424000  |
|  | 1  | 5.519929000 | -2.601658000 | 3.394284000  |
|  | 1  | 4.869323000 | -3.209164000 | 4.812942000  |
|  | 7  | 4.670835000 | 0.070573000  | 4.788331000  |
|  | 1  | 4.851664000 | 0.051704000  | 5.785750000  |
|  | 1  | 5.505090000 | 0.326321000  | 4.268023000  |
|  | 15 | 3.720331000 | -3.021939000 | -3.203939000 |
|  | 7  | 4.703990000 | -2.091069000 | -4.303470000 |
|  | 1  | 5.536518000 | -1.631559000 | -3.946047000 |
|  | 1  | 4.891984000 | -2.558063000 | -5.183514000 |
|  | 7  | 4.692314000 | -4.179004000 | -2.332163000 |
|  | 1  | 4.878226000 | -5.031775000 | -2.848146000 |
|  | 1  | 5.524243000 | -3.853320000 | -1.848512000 |
|  | 15 | 3.708909000 | 4.286202000  | -1.012143000 |
|  | 7  | 4.696047000 | 4.118413000  | -2.440720000 |
|  | 1  | 4.881951000 | 4.993715000  | -2.917400000 |
|  | 1  | 5.530667000 | 3.541133000  | -2.393899000 |
|  | 7  | 4.676384000 | 4.774241000  | 0.354846000  |
|  | 1  | 5.509307000 | 4.238500000  | 0.581331000  |
|  | 1  | 4.858722000 | 5.770737000  | 0.395311000  |

### 3. Coordinates of chosen points for NICS calculation.

**Table S2. Coordinates of points for NICS calculation.**

|                        |    |              |              |              |
|------------------------|----|--------------|--------------|--------------|
| $D_{3h} - [Ge_9]^{4-}$ | 32 | 1.608480000  | 0.000000000  | -1.410366000 |
|                        | 32 | -0.804240000 | -1.392985000 | -1.410366000 |
|                        | 32 | -0.804240000 | 1.392985000  | -1.410366000 |

|                        |         |              |              |              |
|------------------------|---------|--------------|--------------|--------------|
|                        | 32      | 1.608480000  | 0.000000000  | 1.410366000  |
|                        | 32      | -0.804240000 | 1.392985000  | 1.410366000  |
|                        | 32      | -0.804240000 | -1.392985000 | 1.410366000  |
|                        | 32      | 1.250482000  | 2.165898000  | 0.000000000  |
|                        | 32      | 1.250482000  | -2.165898000 | 0.000000000  |
|                        | 32      | -2.500963000 | 0.000000000  | 0.000000000  |
|                        | Point 1 | -1.652600000 | 0.000000000  | 0.000000000  |
|                        | Point 2 | -0.804240000 | 0.000000000  | 0.000000000  |
|                        | Point 3 | 0.000000000  | 0.000000000  | 0.000000000  |
|                        | Point 4 | 0.000000000  | 0.000000000  | -1.410366000 |
|                        | Point 5 | 0.000000000  | 0.000000000  | -2.410366000 |
| $C_{4v} - [Ge_9]^{4-}$ | 32      | 1.419021000  | 1.419021000  | -0.793758000 |
|                        | 32      | -1.419021000 | 1.419021000  | -0.793758000 |
|                        | 32      | 0.000000000  | 1.857957000  | 1.413427000  |
|                        | 32      | 1.419021000  | -1.419021000 | -0.793758000 |
|                        | 32      | 0.000000000  | -1.857957000 | 1.413427000  |
|                        | 32      | -1.419021000 | -1.419021000 | -0.793758000 |
|                        | 32      | 1.857957000  | 0.000000000  | 1.413427000  |
|                        | 32      | 0.000000000  | 0.000000000  | -2.478676000 |
|                        | 32      | -1.857957000 | 0.000000000  | 1.413427000  |
|                        | Point 1 | 0.000000000  | 0.000000000  | -1.636218000 |
|                        | Point 2 | 0.000000000  | 0.000000000  | -0.793758000 |
|                        | Point 3 | 0.000000000  | 0.000000000  | 0.309837000  |
|                        | Point 4 | 0.000002000  | 0.000000000  | 1.413427000  |
|                        | Point 5 | 0.000002000  | 0.000000000  | 2.413427000  |
